# Supplementary material for: Childhood intelligence in relation to major causes of death in 68 year follow-up: prospective population study
Source: PubMed Central journal article supplement (PMC5485432; doi:10.1136/bmj.j2708), 2017-06-28
Supplement: calc037184.ww1.pdf [file calc037184.ww1.pdf]

**Contents**

**Pages 2-4:** Matching death records to individuals in Scottish Mental Survey 1947 database

**Page 5:** Assessing selection bias due to missing MHT scores using the 6-Day Sample, a representative subsample of the Scottish Mental Survey 1947

**Page 6:** Table A, on International Classification of Diseases for major causes of death

**Pages 7-9:** The 30-Day Sample: A representative subsample of the Scottish Mental Survey 1947

**Pages 10-11:** The West of Scotland Twenty-07 study: A replication sample

**Page 12:** Figure A, on associations between intelligence and underlying causes of death in the Scottish Mental Survey 1947

**Page 13:** Figure B, on associations between intelligence and cancer subtypes as underlying causes of death in the Scottish Mental Survey 1947

**Page 14:** Table B, on sex differences in associations between intelligence and major causes of death in the Scottish Mental Survey 1947

**Page 15:** Table C, on sex differences in associations between intelligence and death from specific cancers in the Scottish Mental Survey 1947

**Page 16:** Figure C, on associations between intelligence and causes of death in the Scottish Mental Survey 1947, adjusting for school

**Page 17:** Figure D, on associations between intelligence and cancer subtypes as causes of death in the Scottish Mental Survey 1947, adjusting for school

**Page 18:** Table D, on confounder-adjusted associations between intelligence and leading causes of death in the 30-Day subsample of the Scottish Mental Survey 1947

**Page 19:** Figure E, a cohort comparison of associations between intelligence and underlying causes of death: the Scottish Mental Survey 1947 and the West of Scotland Twenty-07 study

**Page 20:** Table E, on smoking and adult socioeconomic status-adjusted associations between intelligence and underlying causes of death in the West of Scotland Twenty-07 study

## Matching death records to individuals in Scottish Mental Survey 1947

### *1. Matching death records without ID numbers to individuals in the Scottish Mental Survey 1947 database*

Scotland-recorded deaths between 1 July 2015 and 31 December 2015 were provided to the study without unique ID numbers for individuals. Therefore an electronic matching program was run to amalgamate individuals' death data with their respective childhood data. The program used key variables (first name, surname, date of birth) to match individuals in the two datasets, utilising Python programming language (<https://www.python.org/>), the NumPy library for scientific computing (<http://www.numpy.org/>), and, the pandas library for data analysis (<http://pandas.pydata.org/>). In attempting to match 2453 individuals' death data with their childhood records, the program successfully matched 1939 individuals, whereas 514 failed, due largely to first name variants between the two files. Of the failed matches, 315 were resolved manually, leaving 199 non-matches that were excluded from analyses.

### *2. Reconciling mismatches on sex and date of birth between individuals' records in the mortality death and the Scottish Mental Survey 1947 data*

Following the merging of files, there were numbers of mismatches on sex and date of birth identified between the historical records and the linkage data. There were 296 mismatches on sex and 3114 mismatches on date on birth. Manual checks on identifiable data were carried out to reconcile these differences (details below) resulting in 987 exclusions due to mismatching (178 of these also met other exclusion criteria).

**Date of birth mismatches** - There were 3114 mismatches on date of birth (4.3% of the traced sample), which is a similar proportion of mismatches to a previous linkage study in Scotland (Hart et al., Public Health, 2003). The table below summarises the differences in dates of birth between the two records. Firstly, we accepted mismatches as correct matches if there was a difference of 9 days or less in the dates, or, if

there was a difference of 10 days with only one digit different (n=1941). Secondly, we conducted manual checks on samples of mismatches, and confirmed a match if at least one of the following criteria were met: (1) where the name that matched was unusual; (2) where there was an unusual middle name that matched, (3) when there was a confirmed maiden name. This process of manual checking found correct matches for all mismatches where the different dates were exactly one month different, and, where day and month appeared in reverse to the other, and so we accepted these as true matches.

### Reconciling differences in dates of birth between historical and linkage records

| Difference in date of birth   | N           | Action               | Result of manual checking  | Final decision |
|-------------------------------|-------------|----------------------|----------------------------|----------------|
| 1 day out                     | 752         | Accept               | N/A                        | Accept         |
| 2 days out                    | 330         | Accept               | N/A                        | Accept         |
| 3 days out                    | 166         | Accept               | N/A                        | Accept         |
| 4 days out                    | 115         | Accept               | N/A                        | Accept         |
| 5 days out                    | 107         | Accept               | N/A                        | Accept         |
| 6 days out                    | 74          | Accept               | N/A                        | Accept         |
| 7 days out                    | 52          | Accept               | N/A                        | Accept         |
| 8 days out                    | 53          | Accept               | N/A                        | Accept         |
| 9 days out                    | 36          | Accept               | N/A                        | Accept         |
| 10 days out (1 digit out)     | 256         | Accept               | N/A                        | Accept         |
| 10 days out (2 digits out)    | 1           | Check the 1 record   | Uncertain                  | Exclude        |
| 11-30 days out                | 310         | Check 20 records     | 80% correct; 20% uncertain | Exclude        |
| 1 month out                   | 181         | Check 20 records     | 95% correct; 5% uncertain  | Accept         |
| Different month               | 339         | Check 20 records     | 53% correct; 47% uncertain | Exclude        |
| Different month (1 digit out) | 19          | Check all 19 records | 84% correct; 16% uncertain | Exclude        |
| Different year                | 162         | Check 20 records     | 75% correct; 15% uncertain | Exclude        |
| 2 digits out                  | 1           | Check all 3 records  | 1 correct; 2 uncertain     | Exclude        |
| Day and month in reverse      | 5           | Check all 5 records  | 100% correct               | Accept         |
| Very different year           | 3           | Check all 3 records  | 1 correct; 2 uncertain     | Exclude        |
| Different day and month       | 152         | Check 20 records     | 60% correct; 40% uncertain | Exclude        |
| <b>Total</b>                  | <b>3114</b> |                      |                            |                |

**Sex mismatches** - Participants' names were first checked to ensure compatibility between records, and then the forename helped to determine sex. Where there were name ambiguities on sex (n=9), AP, AT, CMC, and IJD, reached a consensus. One match was excluded from analyses due to a mismatch on both forename and date of birth.

## **Sensitivity analyses: Assessing selection bias due to missing MHT scores using the 6-Day Sample, a representative subsample of the Scottish Mental Survey 1947**

We conducted sensitivity analyses on the 6-Day Sample ( $n=1208$ ), a much smaller subsample, which is nevertheless representative of the Scottish Mental Survey 1947 (SMS1947) in terms of geographical spread and average test performance on the Moray House Test.<sup>1</sup> The 6-Day Sample were the 1936-born schoolchildren who were born on the 1<sup>st</sup> day of the even-numbered months. The 6-Day Sample completed, on a different day, a second, individually-administered intelligence test during the same year as the SMS1947 (“Terman-Merrill”, which was a Stanford University revision of the Binet scale). The Terman-Merrill is highly correlated with scores on the Moray House Test, for those who had data on both ( $r=.80$ ,  $n=1112$ ). The 6-Day sub-sample had a rate of missingness on the SMS1947 of 8.0% ( $n=96$ ), similar to that of the total sample (6.8%).

The hazard ratio (HR) and 95% confidence interval for all-cause mortality in association with a one SD higher Terman-Merrill score in the complete 6-Day Sample was 0.71 (95% CI = 0.65 to 0.78), where there were 490 deaths out of 1208 participants. Further, we estimated the HR for all-cause mortality in association with a one SD higher Terman-Merrill score for members of the 6-Day Sample for whom we also had data on the SMS1947 intelligence test (444 deaths out of 1112 participants), as: 0.71 (0.65 to 0.79). Finally, we estimated the equivalent HR for those 6-Day Sample members who had missing SMS1947 intelligence test data (46 deaths out of 96 participants), and the magnitude of the all-cause mortality risk estimate in association with a one SD higher Terman-Merrill score was also unchanged: 0.71 (0.54 to 0.93). This effect size is also similar (albeit slightly stronger) to that which we observed for the association between the Moray House intelligence test and all-cause mortality in the full SMS1947.

Members of the 6-Day Sample who were absentees of the SMS1947 ( $n=96$ ) had on average a lower Terman-Merrill score ( $M=98.9$ ,  $SD=23.7$ ) compared to those who completed the SMS1947 ( $M=102.55$ ,  $SD=20.09$ )—Cohen’s  $d$  was 0.16. We conclude that an absence of lower ability scorers would have made little difference to our main results.

1. Macpherson JS. *Eleven-Year-Olds Grow Up*. London: University of London Press; 1958.

**Table A**

International Classification of Diseases, 6<sup>th</sup>, 7<sup>th</sup>, 8<sup>th</sup>, 9<sup>th</sup> and 10<sup>th</sup> Edition (ICD6, ICD7, ICD8, ICD9 and ICD10) codes for major causes of death

| Primary Diagnosis                           | ICD-6 and ICD-7 Codes                                                 | ICD-8 Codes                                                           | ICD-9 Codes                                                           | ICD-10 Codes                                                             |
|---------------------------------------------|-----------------------------------------------------------------------|-----------------------------------------------------------------------|-----------------------------------------------------------------------|--------------------------------------------------------------------------|
| Cardiovascular Disease                      | 330-334, 410-456                                                      | 393-448                                                               | 390-448                                                               | I01-I78, G45                                                             |
| Coronary Heart Disease                      | 420                                                                   | 410-414                                                               | 402, 410-414, 429.2                                                   | I11, I20-I25                                                             |
| Cerebrovascular Disease (Stroke)            | 330-334                                                               | 430-438                                                               | 430-434, 436-438                                                      | I60-I69, G45, G46.3-.7                                                   |
| All malignant cancers                       | 140-209                                                               | 140-209                                                               | 140-172, 174-209                                                      | C00-C43, C45-C97                                                         |
| Lip, oral cavity and pharynx                | 140-148                                                               | 140-149                                                               | 140-149                                                               | C01, C12, C00-C14                                                        |
| Oesophagus                                  | 150                                                                   | 150                                                                   | 150                                                                   | C15                                                                      |
| Colorectal                                  | 153-154                                                               | 153-154                                                               | 153-154                                                               | C18-C21                                                                  |
| Stomach                                     | 151                                                                   | 151                                                                   | 151                                                                   | C16                                                                      |
| Liver and bile duct                         | 155-156                                                               | 155-156                                                               | 155                                                                   | C22                                                                      |
| Pancreas                                    | 157                                                                   | 157                                                                   | 157                                                                   | C25                                                                      |
| Lung, bronchus                              | 162-163                                                               | 162                                                                   | 162                                                                   | C33-C34                                                                  |
| Skin                                        | 190-191                                                               | 172-173                                                               | 172-173                                                               | C43-C44                                                                  |
| Ovarian (females only)                      | 175                                                                   | 183                                                                   | 183                                                                   | C56                                                                      |
| Breast (females only)                       | 170                                                                   | 174                                                                   | 174-175                                                               | C50                                                                      |
| Prostate (males only)                       | 177                                                                   | 185                                                                   | 185                                                                   | C61                                                                      |
| Kidney, renal pelvis and ureter             | 180                                                                   | 189                                                                   | 189                                                                   | C64-C66                                                                  |
| Urinary bladder                             | 181                                                                   | 188                                                                   | 188-188                                                               | C67                                                                      |
| Brain and central nervous system            | 193                                                                   | 191-192                                                               | 191-192                                                               | C71                                                                      |
| Lymphoid, haematopoietic and related tissue | 200-205                                                               | 200-207                                                               | 200, 204-208                                                          | C81-C96                                                                  |
| All smoking-related cancers                 | 140-165, 171, 175, 180-181, 201,204                                   | 140-151, 153-155, 157, 160-162, 180, 183, 188, 189, 200, 204, 208     | 140-151, 153-155, 157, 160-162, 180, 183, 189, 188, 200, 204-208      | C00-C16, C18-C22, C25, C30-C32, C34, C53, C56, C64-C67, C81-C86, C91-C95 |
| All non-smoking-related cancers             | Remaining malignant cancer codes after deducting smoking cancer codes | Remaining malignant cancer codes after deducting smoking cancer codes | Remaining malignant cancer codes after deducting smoking cancer codes | Remaining malignant cancer codes after deducting smoking cancer codes    |
| Respiratory Diseases                        | 470-527                                                               | 460-519                                                               | 460-519                                                               | J00-J99                                                                  |
| Digestive System Diseases                   | 530-587                                                               | 520-577                                                               | 520-579                                                               | K20-K93                                                                  |
| External Causes of Death                    | E800-E999                                                             | E800-E999                                                             | E800-E999                                                             | V01-Y99                                                                  |
| All accidents                               | E800-E936                                                             | E800-E929                                                             | E800-E929                                                             | V01-X59                                                                  |
| Intentional self-harm (suicide)             | E970-E979                                                             | E950-E959                                                             | E950-E959                                                             | X60-X84, Y87                                                             |
| Open verdict                                | -                                                                     | E980-E989                                                             | E980-E989                                                             | Y10-Y34, Y87.2, Y89.9                                                    |
| Dementia                                    | 304-306                                                               | 290, 293                                                              | 290, 294, 331                                                         | F00-F01, F03, F09, G30, G31                                              |

## **The 30-Day Sample: A representative subsample of the Scottish Mental Survey 1947**

### ***Participants***

The 36-Day Sample (N=7380; 10.4%) members of the Scottish Mental Survey 1947 (SMS1947) were those children born on the first, second, and third days of every month in 1936, who were selected for more thorough investigation in 1947, and who were similar to the full SMS1947 in terms of geographical representativeness and mean Moray House Test performance.<sup>1</sup> After excluding members of the 6-Day Sample – those born on the first day of even numbered months – who took part in annual follow-up visits into adulthood<sup>2</sup>, we have selected the remainder (30-Day Sample) for the present sensitivity analyses, which have been the subject of previous investigations.<sup>3,4</sup> Just as for the full SMS1947, the linkage of members of the 30-Day Sample to their mortality records was given approval by National Services Scotland NHS Privacy Advisory Committee and the Confidentiality Advisory Group of the Health Research Authority.<sup>5</sup>

### ***Measures***

#### *Intelligence, socioeconomic status, and physical status*

The Moray House Test No. 12 was the measurement of intelligence, described in detail in the main manuscript. Covariate data that were recorded in 1947 around the same time as the intelligence test<sup>6</sup> included three variables indicating socioeconomic status, which can be used to account for potential confounding in the present study. These were: 1) *Father's, or head of household, occupation*, coded according to levels (from low to high status) using the 1951 Classification of Occupations<sup>7</sup>: unskilled jobs, semi-skilled, manual or non-manual skilled, intermediate, professional; 2) *Home occupancy*, calculated by dividing the number of individuals living in the child's home by the number of rooms within the home; and 3) *absent school days during the school year 1946-47*, calculated as a percentage. Confounding by physical status can be assessed in the present study by further controlling for height (inches), and the presence of physical disability (chorea, congenital paralysis, defective vision, deafness, encephalitis, epilepsy, and/or, meningitis).

### *Vital status*

The procedures for tracing and linkage of the 30-Day Sample to death certificates are those detailed in the main manuscript for the SMS1947. Among 5083 of the historical sample with intelligence test scores, 4775 (93.9%) were traced for linkage to death records. By the follow-up date (31<sup>st</sup> December 2015), there were 1755 deceased, 2372 resident in Scotland, England or Wales, 357 embarked, and 23 Army conscripts.

### *Statistical analysis*

The analytic sample included 4149 participants (81.6% of the 30-Day Sample) who were linked to mortality records, and who had complete data on intelligence test score, socioeconomic status and physical status measures. Missing intelligence test scores affected 452, or 9.1%, of the *30-Day Sample*, which is consistent with the full SMS1947 as detailed in the main manuscript. There were 1531 deaths recorded in the analytic sample

### *References*

<sup>1</sup>Maxwell J. The level and trend of national intelligence: the contribution of the Scottish mental surveys (no. 48). London: University of London Press; 1961.

<sup>2</sup>Deary IJ, Whalley LW, Starr JM. A lifetime of intelligence: follow-up studies of the Scottish Mental Surveys of 1932 and 1947. Washington DC: American Psychological Association; 2009.

<sup>3</sup>Batty GD, Calvin CM, Brett CE, Čukić I, Deary IJ. Childhood body weight in relation to morbidity from cardiovascular disease and cancer in older adulthood: 67-year follow-up of participants in the 1947 Scottish Mental Survey. *American journal of epidemiology*. 2015 Nov 1;182(9):775-80.



<sup>4</sup>Batty GD, Calvin CM, Brett CE, Cukic I, Deary IJ. Childhood body weight in relation to cause-specific mortality: 67 year follow-up of participants in the 1947 Scottish Mental Survey. *Medicine*. 2016 Feb 1;95(6):e2263.

<sup>5</sup>Brett CE, Deary IJ. Realising health data linkage from a researcher's perspective: following up the 6-Day Sample of the Scottish Mental Survey 1947. *Longitudinal and Life Course Studies*. 2014 Oct 30;5(3):283-98.

<sup>6</sup>Scottish Council for Research in Education. *The trend of Scottish intelligence: A comparison of the 1947 and 1932 surveys of the intelligence of eleven-year-old pupils*. London: University of London Press; 1949.

<sup>7</sup>General Register Office. *Classification of occupations 1951*. London: Her Majesty's Stationary Office; 1956.

## **The West of Scotland Twenty-07 study: A replication sample**

### ***Participants***

Participants are drawn from the West of Scotland Twenty-07 Study. This is a longitudinal study designed to investigate the social determinants of health and health inequalities. It comprises three narrow age cohorts who were aged 15, 35 and 56 at baseline in 1987/88. Study participants were randomly sampled from the Central Clydeside Conurbation, a mainly urban area centred on Glasgow city. They were interviewed in their homes by trained interviewers at baseline and on up to four further occasions over the following 20 years. Further details of the study are given elsewhere.<sup>1</sup> A comparison with data from the 1991 UK Census showed it to be representative of the underlying population in terms of sex, social class, car ownership and household tenure.<sup>2</sup> Data used in the replication study pertain to the oldest of the three cohorts obtained at baseline (N=1551) plus vital status obtained by record linkage. The birth years of the oldest cohort were: 1930 (n=60), 1931 (n=438), 1932 (n=825), and, 1933 (n=39).

### ***Measures***

#### ***Alice Heim 4 test of General Intelligence (AH4)***

Part I of the AH4<sup>3</sup> was administered to the oldest cohort of the Twenty-07 study at baseline. The AH4 was designed for use with a cross section of the adult population and part I consists of 65 questions which measure verbal and numeric cognitive abilities. It was administered according to the instructions in the test manual. The result used here is the total number of questions answered correctly within the time limit of 10 minutes. For comparability this total score is standardised to zero mean and unit standard deviation (z-scored).

### *Vital Status*

Vital status was ascertained via linkage to the UK's NHS central register. Participants of the Twenty-07 study were 'flagged' at the NHS central register at the outset of the study and since then regular notifications of deaths, embarkations and re-entries have been provided to the study. These notifications include date and cause of death. Primary and secondary causes are given in textual and coded forms, the latter being a mixture of ICD versions 9 and 10. The primary outcome here is the underlying cause of death grouped as shown in Supplementary Table 1. Of the analytic sample there were 820 deceased (men: 423) and 542 living by the census date (2<sup>nd</sup> February 2017).

### *Covariates*

Smoking status was classified as current smoker/ex-smoker/never smoked. The Social Class measure is derived from the occupation of the head of household coded to the six fold Registrar General's classification: Professional/Managerial and technical/Skilled non-manual/Skilled manual/Semi-skilled/Unskilled.<sup>4</sup> Self-rated health (over the last twelve months) was recorded as excellent/good/fair/poor—this was dichotomised into excellent or good vs fair or poor. All covariates were treated as categorical when adjusted for.

### *References*

<sup>1</sup>Benzeval M, Der G, Ellaway A, et al. Cohort Profile: West of Scotland Twenty-07 Study: Health in the Community. *International Journal of Epidemiology*. 2009;38(5):1215-1223.

<sup>2</sup>Der G. A comparison of the West of Scotland Twenty-07 study sample and the 1991 census SARs. Glasgow, 1998

<sup>3</sup>Heim AW. AH 4 Group Test of General Intelligence. Manual. By A (lice) W (inifred) Heim. Rev. Ed. NFER Publishing Company; 1970.

<sup>4</sup>OPCS. Classification of Occupations. HMSO. London, 1980.

## Figure A

Hazard ratios (95% confidence intervals) for the association between a one SD higher score in intelligence test score at age 11 years and underlying cause of death in the Scottish Mental Survey 1947, N=65 765.

Hazard ratios (HR) are adjusted for age at intelligence testing, and sex.

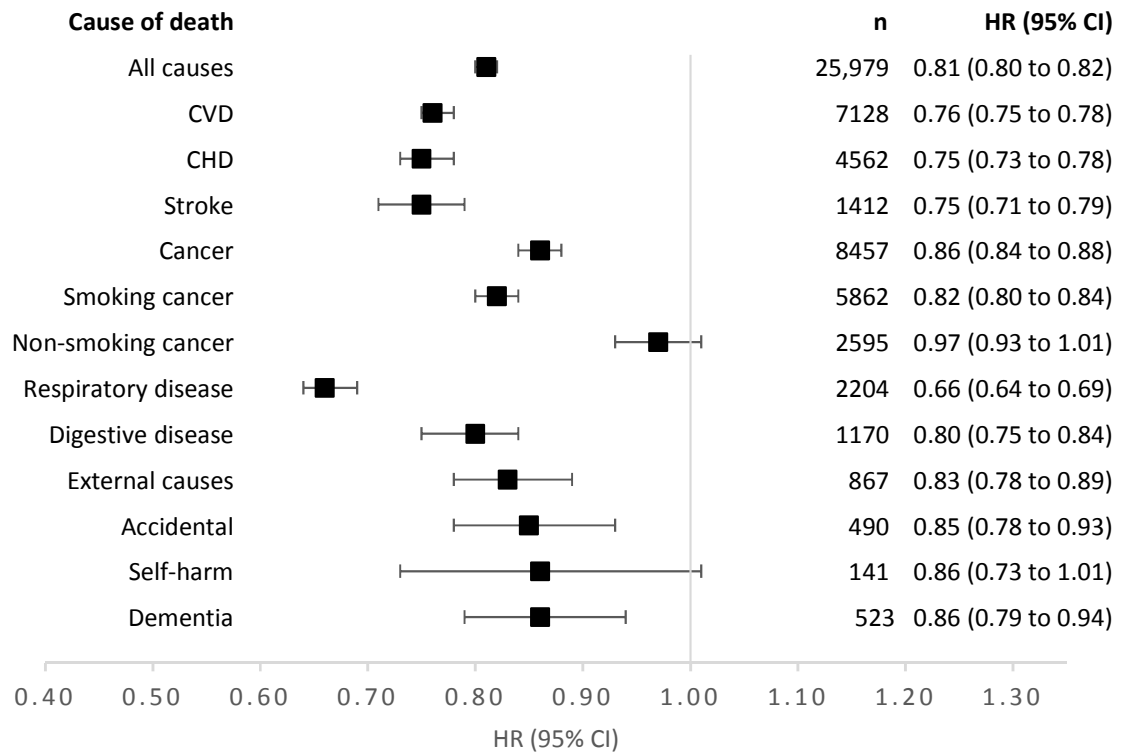

**Figure B**

Hazard ratios (95% confidence intervals) for the association between a one SD higher score in intelligence test score at age 11 years and underlying cause of death by cancer type to age 79 years in the Scottish Mental Survey 1947. Hazard ratios (HR) are adjusted for age at intelligence testing, and sex, with the exceptions of ovarian and breast cancer (women only), and, prostate cancer (men only).

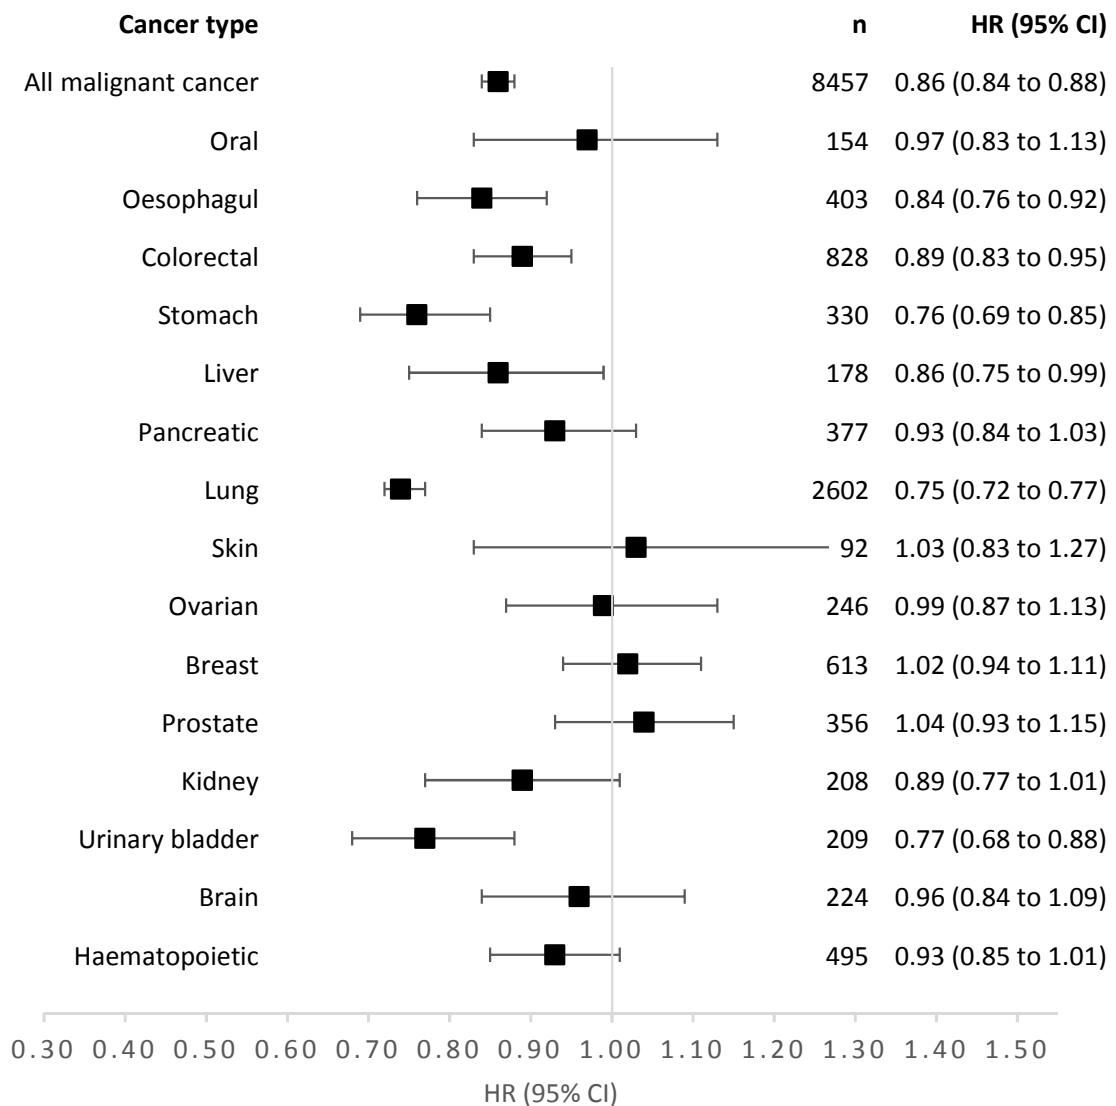

**Table B**

Hazard Ratios (and 95% confidence intervals) for a one SD higher score in intelligence score at age 11 years in relation to major causes of death in men and women separately in the Scottish Mental Survey 1947

| Cause of death           | Males  |                     | Females |                     | p-value for sex by MHT interaction effect |
|--------------------------|--------|---------------------|---------|---------------------|-------------------------------------------|
|                          | N      | HR (95% CI)         | N       | HR (95% CI)         |                                           |
| All causes               | 15 271 | 0.83 (0.82 to 0.84) | 10 708  | 0.78 (0.77 to 0.80) | <0.001                                    |
| Cardiovascular disease   | 6070   | 0.79 (0.77 to 0.81) | 3549    | 0.70 (0.68 to 0.73) | <0.001                                    |
| Coronary heart disease   | 4045   | 0.78 (0.76 to 0.81) | 1810    | 0.67 (0.64 to 0.70) | <0.001                                    |
| Stroke                   | 1114   | 0.78 (0.74 to 0.83) | 939     | 0.72 (0.68 to 0.77) | 0.07                                      |
| Cancer                   | 4890   | 0.87 (0.85 to 0.89) | 4016    | 0.84 (0.82 to 0.87) | 0.15                                      |
| Smoking related          | 3614   | 0.84 (0.81 to 0.86) | 2597    | 0.79 (0.76 to 0.82) | 0.02                                      |
| Non-smoking-related      | 1276   | 0.96 (0.91 to 1.02) | 1419    | 0.96 (0.91 to 1.01) | 0.87                                      |
| Respiratory disease      | 3059   | 0.75 (0.73 to 0.78) | 2254    | 0.68 (0.65 to 0.70) | <0.001                                    |
| Digestive-system disease | 1088   | 0.85 (0.80 to 0.90) | 780     | 0.78 (0.73 to 0.84) | 0.09                                      |
| External cause           | 998    | 0.82 (0.78 to 0.87) | 567     | 0.85 (0.78 to 0.93) | 0.41                                      |
| Accidental               | 505    | 0.82 (0.76 to 0.89) | 278     | 0.77 (0.68 to 0.87) | 0.54                                      |
| Intentional self-harm    | 102    | 0.80 (0.66 to 0.96) | 42      | 1.15 (0.82 to 1.60) | 0.06                                      |
| Dementia                 | 414    | 0.90 (0.82 to 0.98) | 373     | 0.76 (0.69 to 0.85) | 0.02                                      |

*N* = 65 765. All HRs are adjusted for age at intelligence testing. MHT = Moray House Test.

**Table C**

Hazard Ratios (and 95% confidence intervals) for a one SD higher score in intelligence score at age 11 years with specific cancer-related deaths in men and women separately in the Scottish Mental Survey 1947

| Cancer type    | Males |                     | Females |                     | <i>p</i> -value for sex by MHT interaction effect |
|----------------|-------|---------------------|---------|---------------------|---------------------------------------------------|
|                | N     | HR (95% CI)         | N       | HR (95% CI)         |                                                   |
| Oral           | 124   | 0.92 (0.78 to 1.09) | 52      | 1.15 (0.85 to 1.56) | 0.14                                              |
| Oesophageal    | 293   | 0.87 (0.78 to 0.98) | 130     | 0.81 (0.68 to 0.96) | 0.72                                              |
| Colorectal     | 558   | 0.92 (0.85 to 1.00) | 349     | 0.83 (0.74 to 0.92) | 0.09                                              |
| Stomach        | 223   | 0.79 (0.69 to 0.89) | 121     | 0.73 (0.61 to 0.88) | 0.47                                              |
| Liver          | 142   | 0.88 (0.75 to 1.04) | 54      | 0.74 (0.57 to 0.98) | 0.31                                              |
| Pancreatic     | 203   | 0.98 (0.86 to 1.12) | 186     | 0.87 (0.75 to 1.02) | 0.36                                              |
| Lung           | 1513  | 0.77 (0.74 to 0.81) | 1089    | 0.70 (0.66 to 0.75) | 0.01                                              |
| Skin           | 58    | 1.05 (0.81 to 1.36) | 44      | 0.99 (0.72 to 1.36) | 0.73                                              |
| Kidney         | 151   | 0.94 (0.81 to 1.10) | 78      | 0.85 (0.67 to 1.06) | 0.43                                              |
| Bladder        | 162   | 0.82 (0.71 to 0.95) | 86      | 0.77 (0.62 to 0.95) | 0.53                                              |
| Brain          | 136   | 0.92 (0.79 to 1.09) | 93      | 1.00 (0.80 to 1.24) | 0.67                                              |
| Haematopoietic | 341   | 0.87 (0.79 to 0.97) | 208     | 0.98 (0.84 to 1.13) | 0.18                                              |

*N* = 65 765. All HRs are adjusted for age at intelligence testing. Final column indicates *p*-values for interaction effects between sex and childhood intelligence in models that include the total sample. MHT = Moray House Test.

### Figure C

Hazard ratios (95% confidence intervals) for the association between a one SD higher score in intelligence test score at age 11 years and cause of death in the Scottish Mental Survey 1947, adjusting for school (N=65 765). Hazard ratios (HR) are adjusted for age at intelligence testing, and sex.

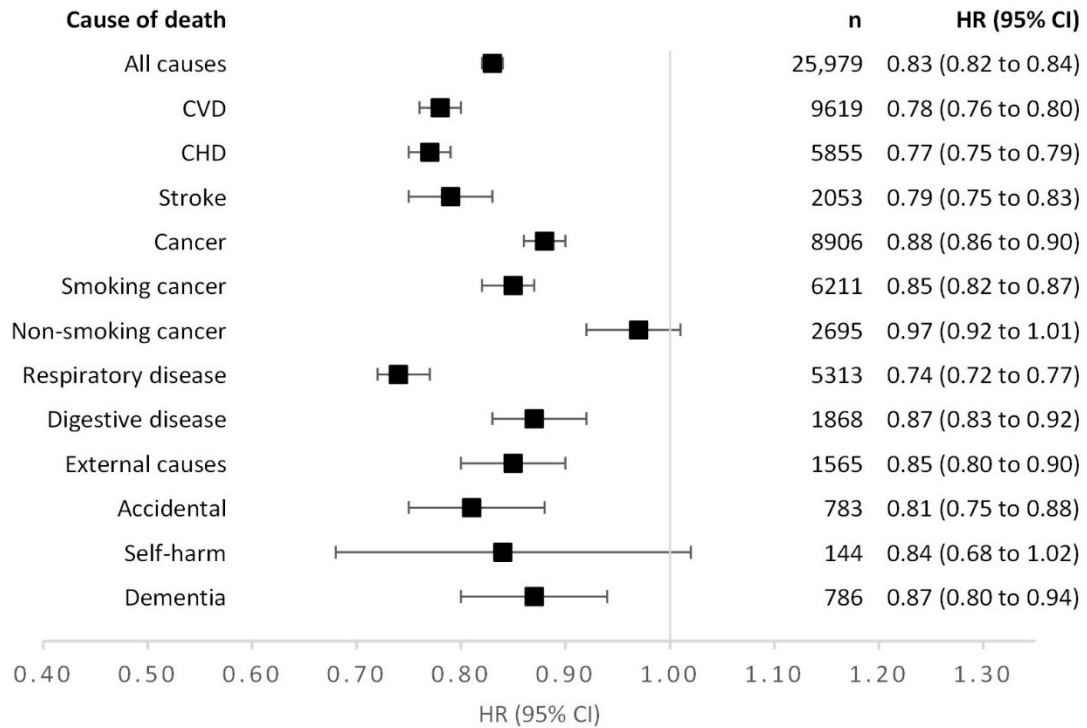



### Figure D

Hazard ratios (95% confidence intervals) for the association between a one SD higher score in intelligence test score at age 11 years and cause of death by cancer type in the Scottish Mental Survey 1947, adjusting for school. Hazard ratios (HR) are also adjusted for age at intelligence testing, and sex, with the exceptions of ovarian and breast cancer (women only), and, prostate cancer (men only).

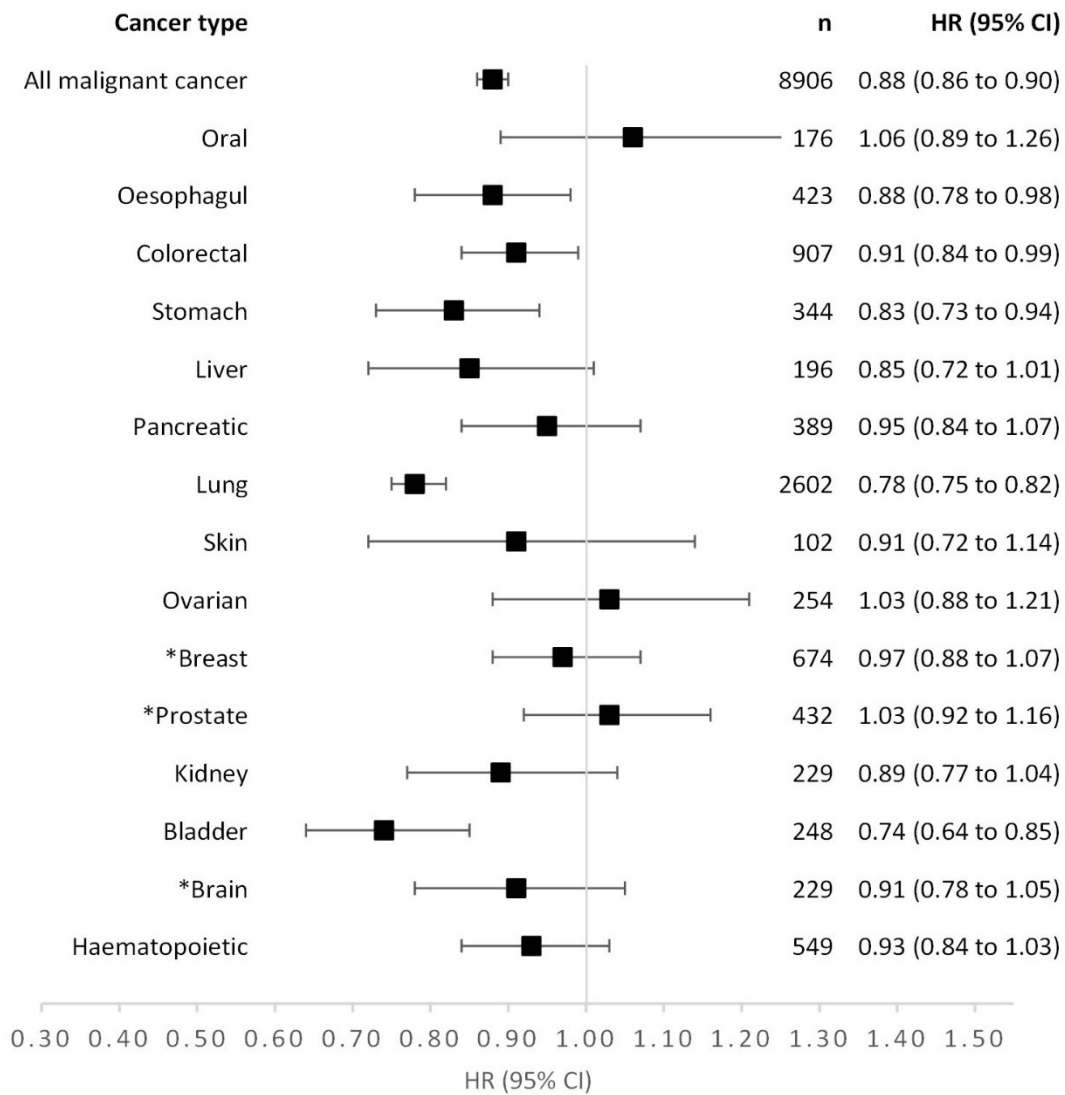

**Table D**

Hazard ratios (95% confidence intervals) for the association between a one SD higher intelligence test score at age 11 years and cause of death to age 79, accounting for childhood socioeconomic factors and physical status indicators in the 30-Day subsample<sup>a</sup> of the Scottish Mental Survey 1947

| Cause of death           | N cases | Model 1:                     | Model 2:                                                | Model 3:                                          | %                                          | %                             |
|--------------------------|---------|------------------------------|---------------------------------------------------------|---------------------------------------------------|--------------------------------------------|-------------------------------|
|                          |         | Age, sex and school-adjusted | Model 1 + background socioeconomic factors <sup>b</sup> | Model 2 + physical status indicators <sup>c</sup> | attenuation <sup>d</sup> :<br>Model 1 to 2 | attenuation:<br>Models 1 to 3 |
| All causes               | 1531    | 0.82 (0.78 to 0.86)          | 0.84 (0.80 to 0.89)                                     | 0.85 (0.80 to 0.90)                               | 15.8                                       | 18.9                          |
| Cardiovascular disease   | 700     | 0.80 (0.75 to 0.87)          | 0.82 (0.76 to 0.88)                                     | 0.82 (0.76 to 0.89)                               | 7.1                                        | 10.1                          |
| Cancer                   | 584     | 0.86 (0.79 to 0.94)          | 0.90 (0.82 to 0.98)                                     | 0.90 (0.82 to 0.98)                               | 26.4                                       | 25.8                          |
| Smoking related cancer   | 407     | 0.83 (0.75 to 0.91)          | 0.86 (0.78 to 0.95)                                     | 0.86 (0.76 to 0.95)                               | 21.3                                       | 20.6                          |
| Non-smoking cancer       | 177     | 0.95 (0.82 to 1.10)          | 0.98 (0.84 to 1.15)                                     | 0.98 (0.87 to 1.16)                               | 70.1                                       | 69.4                          |
| Respiratory disease      | 367     | 0.73 (0.66 to 0.80)          | 0.76 (0.68 to 0.84)                                     | 0.75 (0.68 to 0.84)                               | 12.7                                       | 11.5                          |
| Digestive-system disease | 122     | 0.79 (0.67 to 0.95)          | 0.84 (0.70 to 1.01)                                     | 0.84 (0.70 to 1.01)                               | 24.7                                       | 24.7                          |
| External cause           | 86      | 0.99 (0.80 to 1.23)          | 0.99 (0.79 to 1.24)                                     | 1.03 (0.82 to 1.30)                               | -                                          | -                             |
| Dementia                 | 52      | 1.02 (0.77 to 1.35)          | 1.00 (0.75 to 1.35)                                     | 1.03 (0.76 to 1.39)                               | 77.2                                       | 32.5                          |

<sup>a</sup>N = 4031, with complete data on all covariates (79.3% of 30-Day subsample).

<sup>b</sup>Childhood socioeconomic status indicators include: (1) father's or head of household's occupational status, (2) home overcrowding, (3) school absenteeism during 1946 to 1947

<sup>c</sup>Physical status indicators include: (1) height (cm) in 1947; (2) physical disability

<sup>d</sup>Percent attenuation =  $100 * ((\beta_{\text{confounder-adjusted model}} - \beta_{\text{model 1}}) / (\beta_{\text{model 1}}))$

### Figure E

Hazard ratios (95% confidence intervals) for the association between a one SD higher score in premorbid intelligence test score and underlying cause of death by older adulthood, in the Scottish Mental Survey 1947 and West of Scotland Twenty-07 cohorts. Hazard ratios (HR) are adjusted for age at intelligence testing, and sex.

#### Cause of death

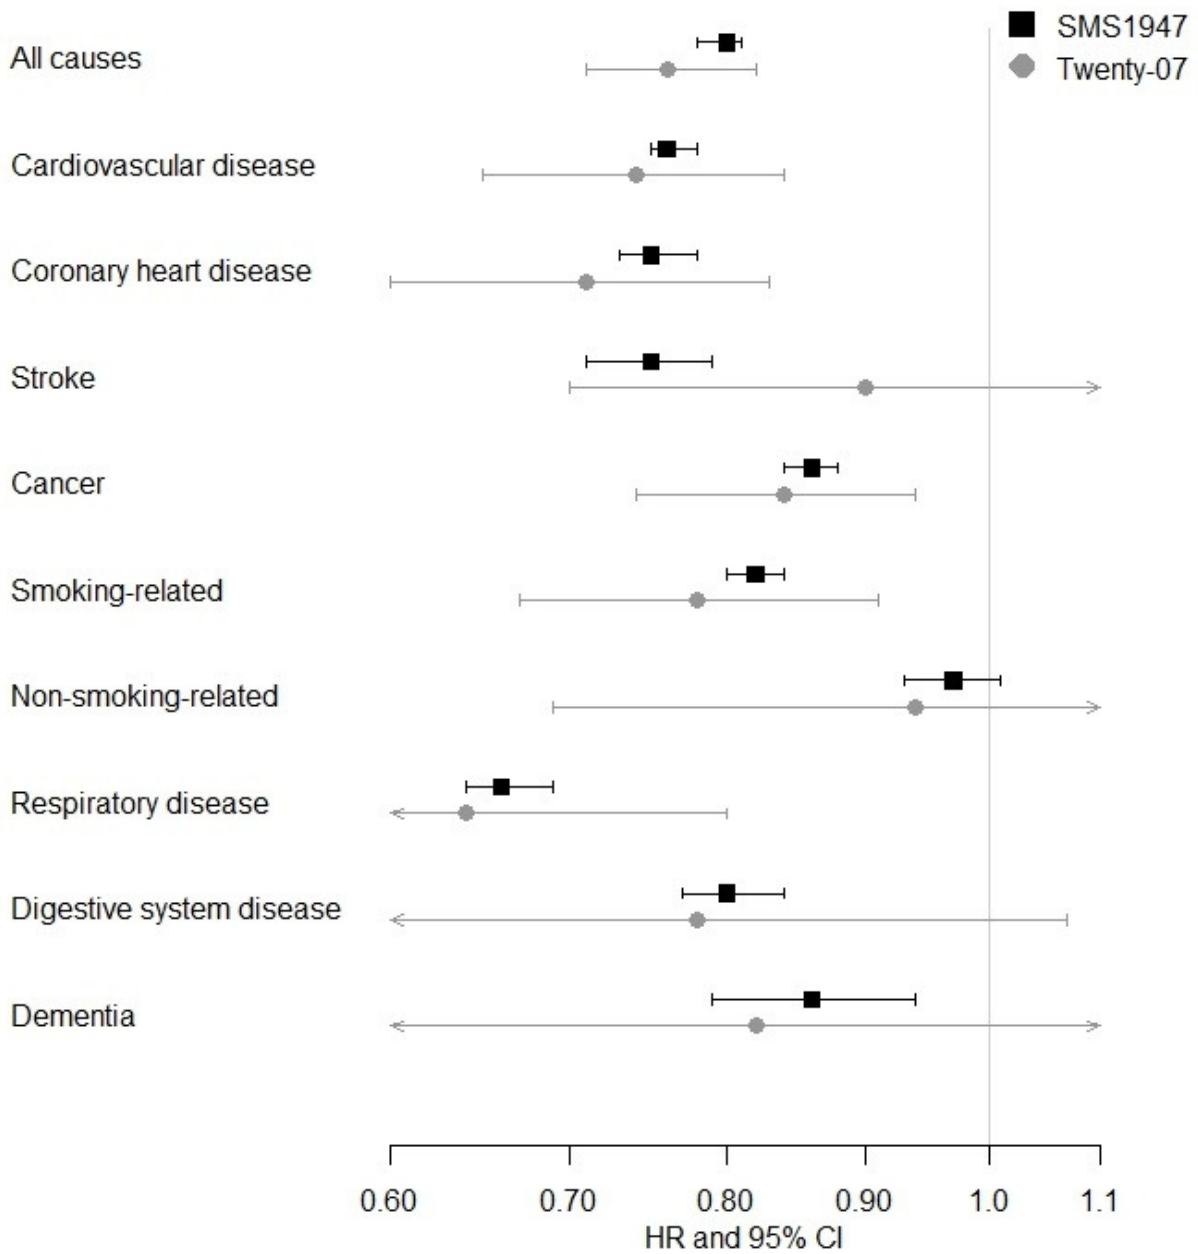

**Table E**

Hazard ratios (95% confidence intervals) for the association between a one SD higher Alice Heim 4 test score at age ~55 years and cause of death by older adulthood, accounting for smoking and socioeconomic status, in the West of Scotland Twenty-07 Study<sup>a</sup>

| Cause of death           | N cases | Model 1: Sex        | Model 2:            | Model 3:                       | Model 4:                     | % attenuation <sup>b</sup> | % attenuation | % attenuation |
|--------------------------|---------|---------------------|---------------------|--------------------------------|------------------------------|----------------------------|---------------|---------------|
|                          |         |                     | model 1 + smoking   | model 2 + socioeconomic status | model 3 self-assessed health | Model 1 to 2               | Model 1 to 3  | Model 1 to 4  |
| All causes               | 820     | 0.76 (0.71 to 0.82) | 0.81 (0.75 to 0.87) | 0.82 (0.75 to 0.89)            | 0.84 (0.77 to 0.91)          | 23.2                       | 27.7          | 36.5          |
| Cardiovascular disease   | 272     | 0.74 (0.65 to 0.84) | 0.78 (0.68 to 0.89) | 0.79 (0.68 to 0.91)            | 0.82 (0.70 to 0.95)          | 17.5                       | 21.7          | 34.1          |
| Coronary heart disease   | 163     | 0.71 (0.60 to 0.83) | 0.74 (0.63 to 0.88) | 0.75 (0.62 to 0.91)            | 0.79 (0.65 to 0.96)          | 12.1                       | 16.0          | 31.2          |
| Stroke                   | 66      | 0.90 (0.70 to 1.15) | 0.96 (0.74 to 1.24) | 1.03 (0.77 to 1.37)            | 1.04 (0.78 to 1.39)          | 61.3                       | 128.1         | 137.2         |
| Cancer                   | 290     | 0.84 (0.74 to 0.94) | 0.88 (0.78 to 1.00) | 0.87 (0.76 to 1.00)            | 0.88 (0.76 to 1.01)          | 26.7                       | 20.1          | 26.7          |
| Smoking related          | 188     | 0.78 (0.67 to 0.91) | 0.86 (0.73 to 1.00) | 0.86 (0.72 to 1.03)            | 0.87 (0.73 to 1.04)          | 39.3                       | 39.3          | 44.0          |
| Lung cancer              | 86      | 0.74 (0.59 to 0.92) | 0.86 (0.68 to 1.10) | 0.88 (0.68 to 1.14)            | 0.90 (0.69 to 1.18)          | 49.9                       | 57.5          | 65.0          |
| Non-smoking-related      | 42      | 0.94 (0.69 to 1.28) | 0.87 (0.64 to 1.19) | 0.81 (0.57 to 1.15)            | 0.80 (0.56 to 1.13)          | -125.1                     | -240.6        | -260.6        |
| Respiratory disease      | 95      | 0.64 (0.51 to 0.80) | 0.70 (0.55 to 0.88) | 0.74 (0.58 to 0.95)            | 0.77 (0.59 to 0.99)          | 20.1                       | 32.5          | 41.4          |
| Digestive-system disease | 41      | 0.78 (0.56 to 1.07) | 0.80 (0.57 to 1.11) | 0.76 (0.52 to 1.09)            | 0.75 (0.52 to 1.08)          | 10.2                       | -10.5         | -15.8         |
| Dementia                 | 37      | 0.82 (0.58 to 1.15) | 0.85 (0.60 to 1.20) | 0.95 (0.65 to 1.39)            | 0.99 (0.68 to 1.46)          | 18.2                       | 74.2          | 94.9          |

<sup>a</sup>N = 1362 (men = 613)

<sup>b</sup>Percent attenuation =  $100 * ((\beta_{\text{confounder-adjusted model}} - \beta_{\text{model 1}}) / (\beta_{\text{model 1}}))$
